# Supplementary material
Source: publisher figshare collection journal article supplement (https://aacr.figshare.com/articles/dataset/_/22474493)
Supplement: Supplementary file 1 [file 39925988]

A

Known CNVs detected

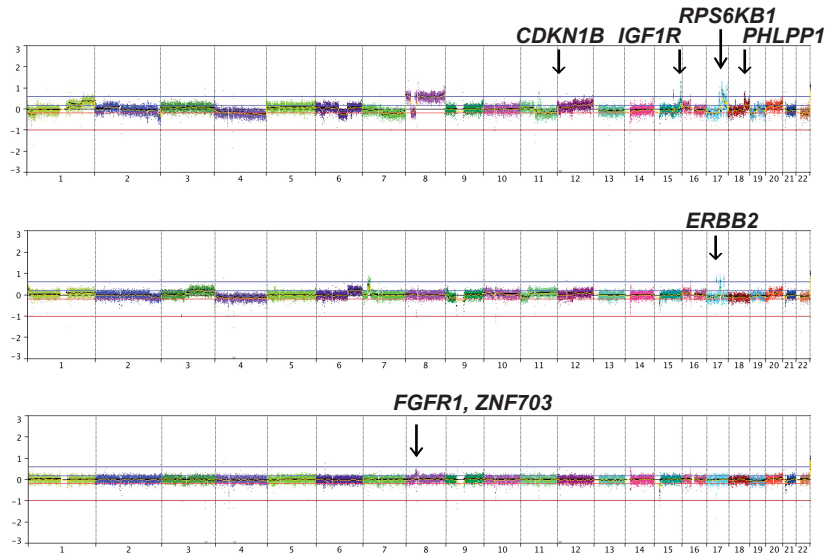

Tumor Fraction

20.1%

15.1%

5.2%

Known CNVs not detected

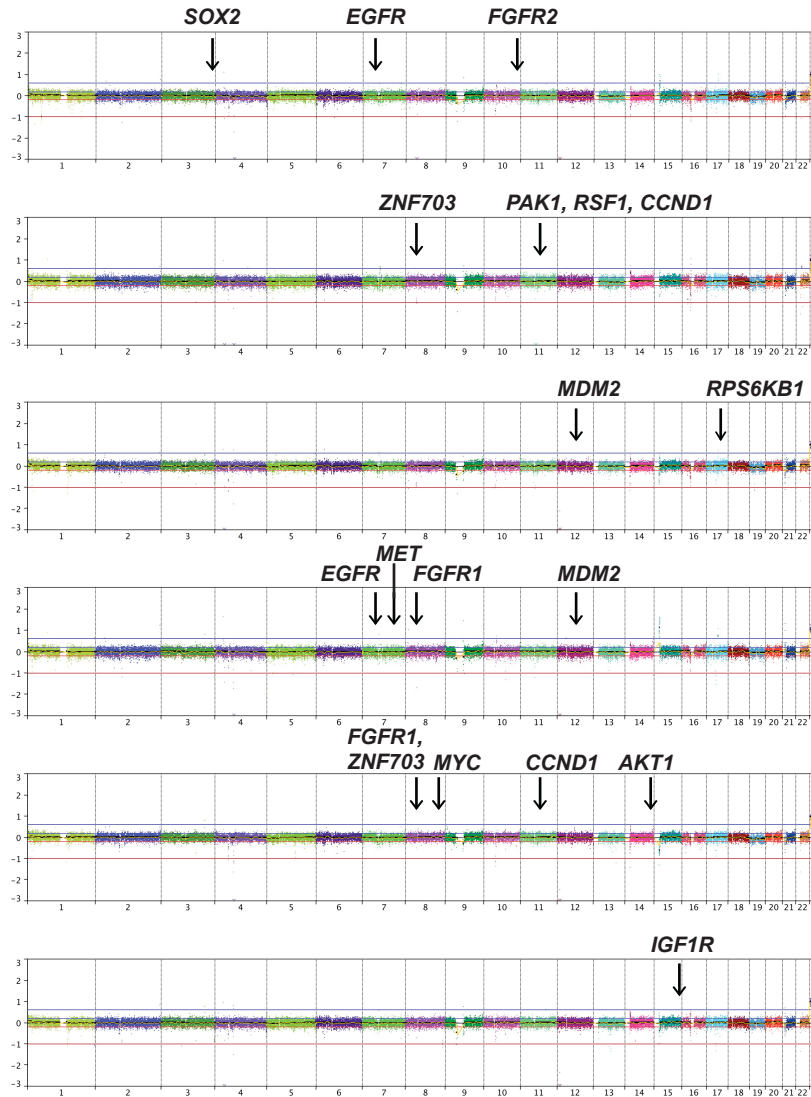

2.7%

0

0

0

0

0

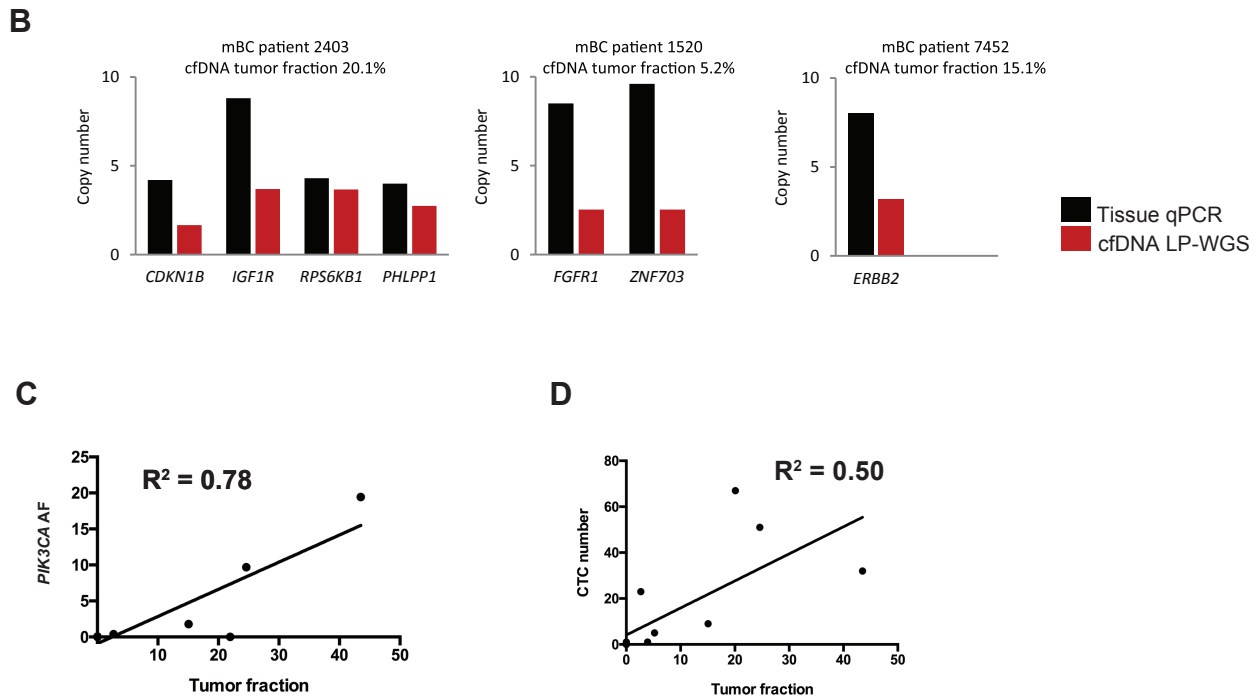

### Figure S2.

Validation of LP-WGS in cfDNA from mBC patients (FERGI). **A**, CNV whole-genome view of cfDNA from 9 patients. Genes with known copy number gains in the matched tumor tissue were annotated. **B**, Comparisons of gene copy numbers detected in tissue by qPCR and in cfDNA by LP-WGS. Tissue was collected 15 years (2403) and 5 years (1520, 7452) prior to plasma collection. (**C-D**) Association between cfDNA tumor fraction estimated by LP-WGS and **C**, *PIK3CA* somatic allele frequency (AF) determined by digital PCR or **D**, CTC number from plasma of mBC patients (FERGI).
